# Supplementary material for: Senescent cancer cell vaccines induce cytotoxic T cell responses targeting primary tumors and disseminated tumor cells
Source: HighWire-hosted journal article supplement (doi:10.1136/jitc-2022-005862), 2023-02-01

Figure S1

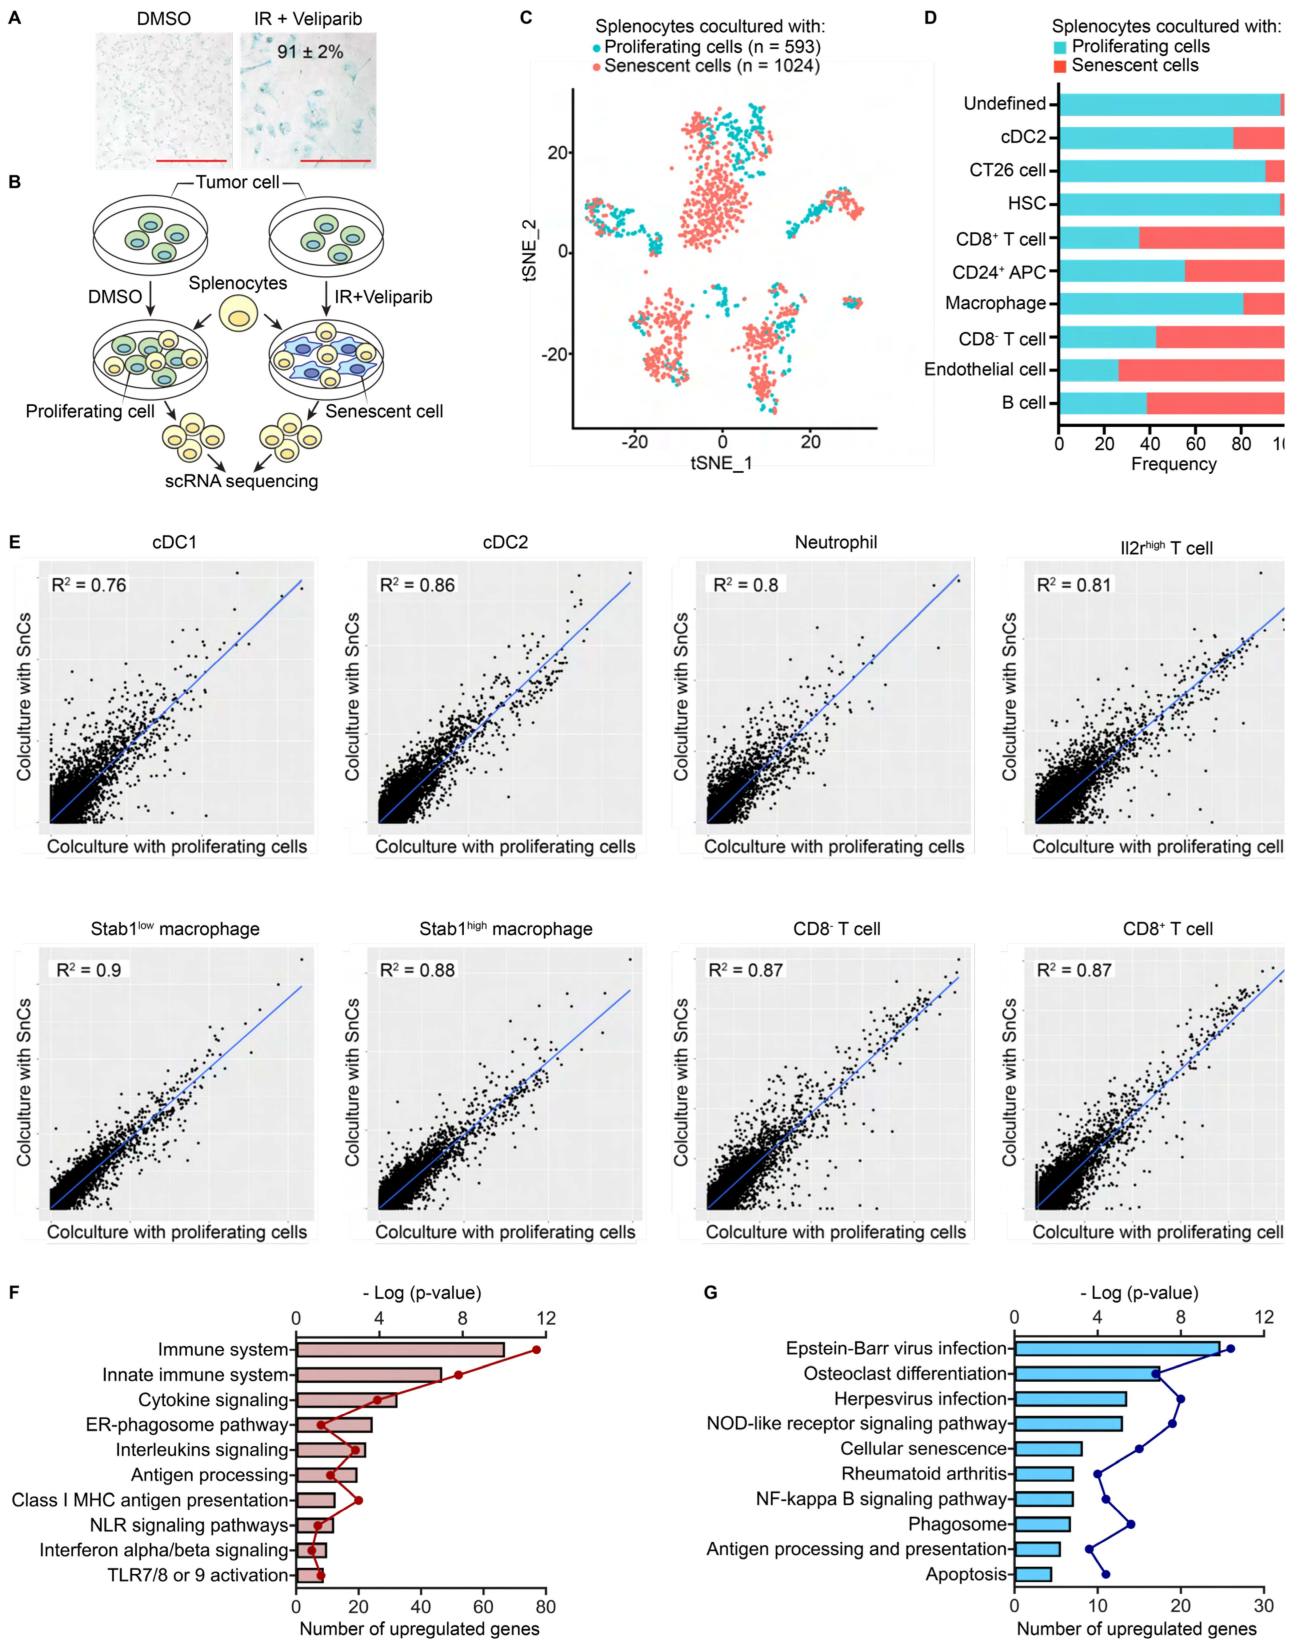

Figure S2

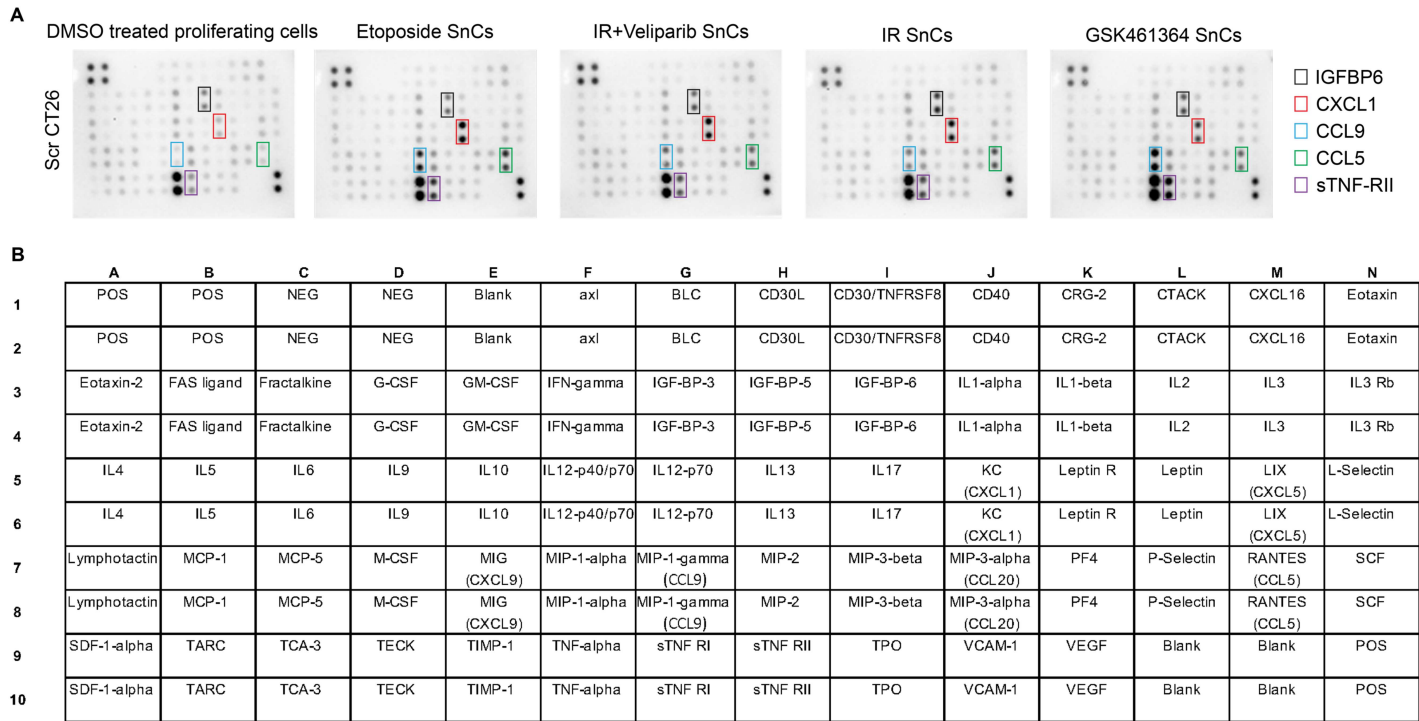

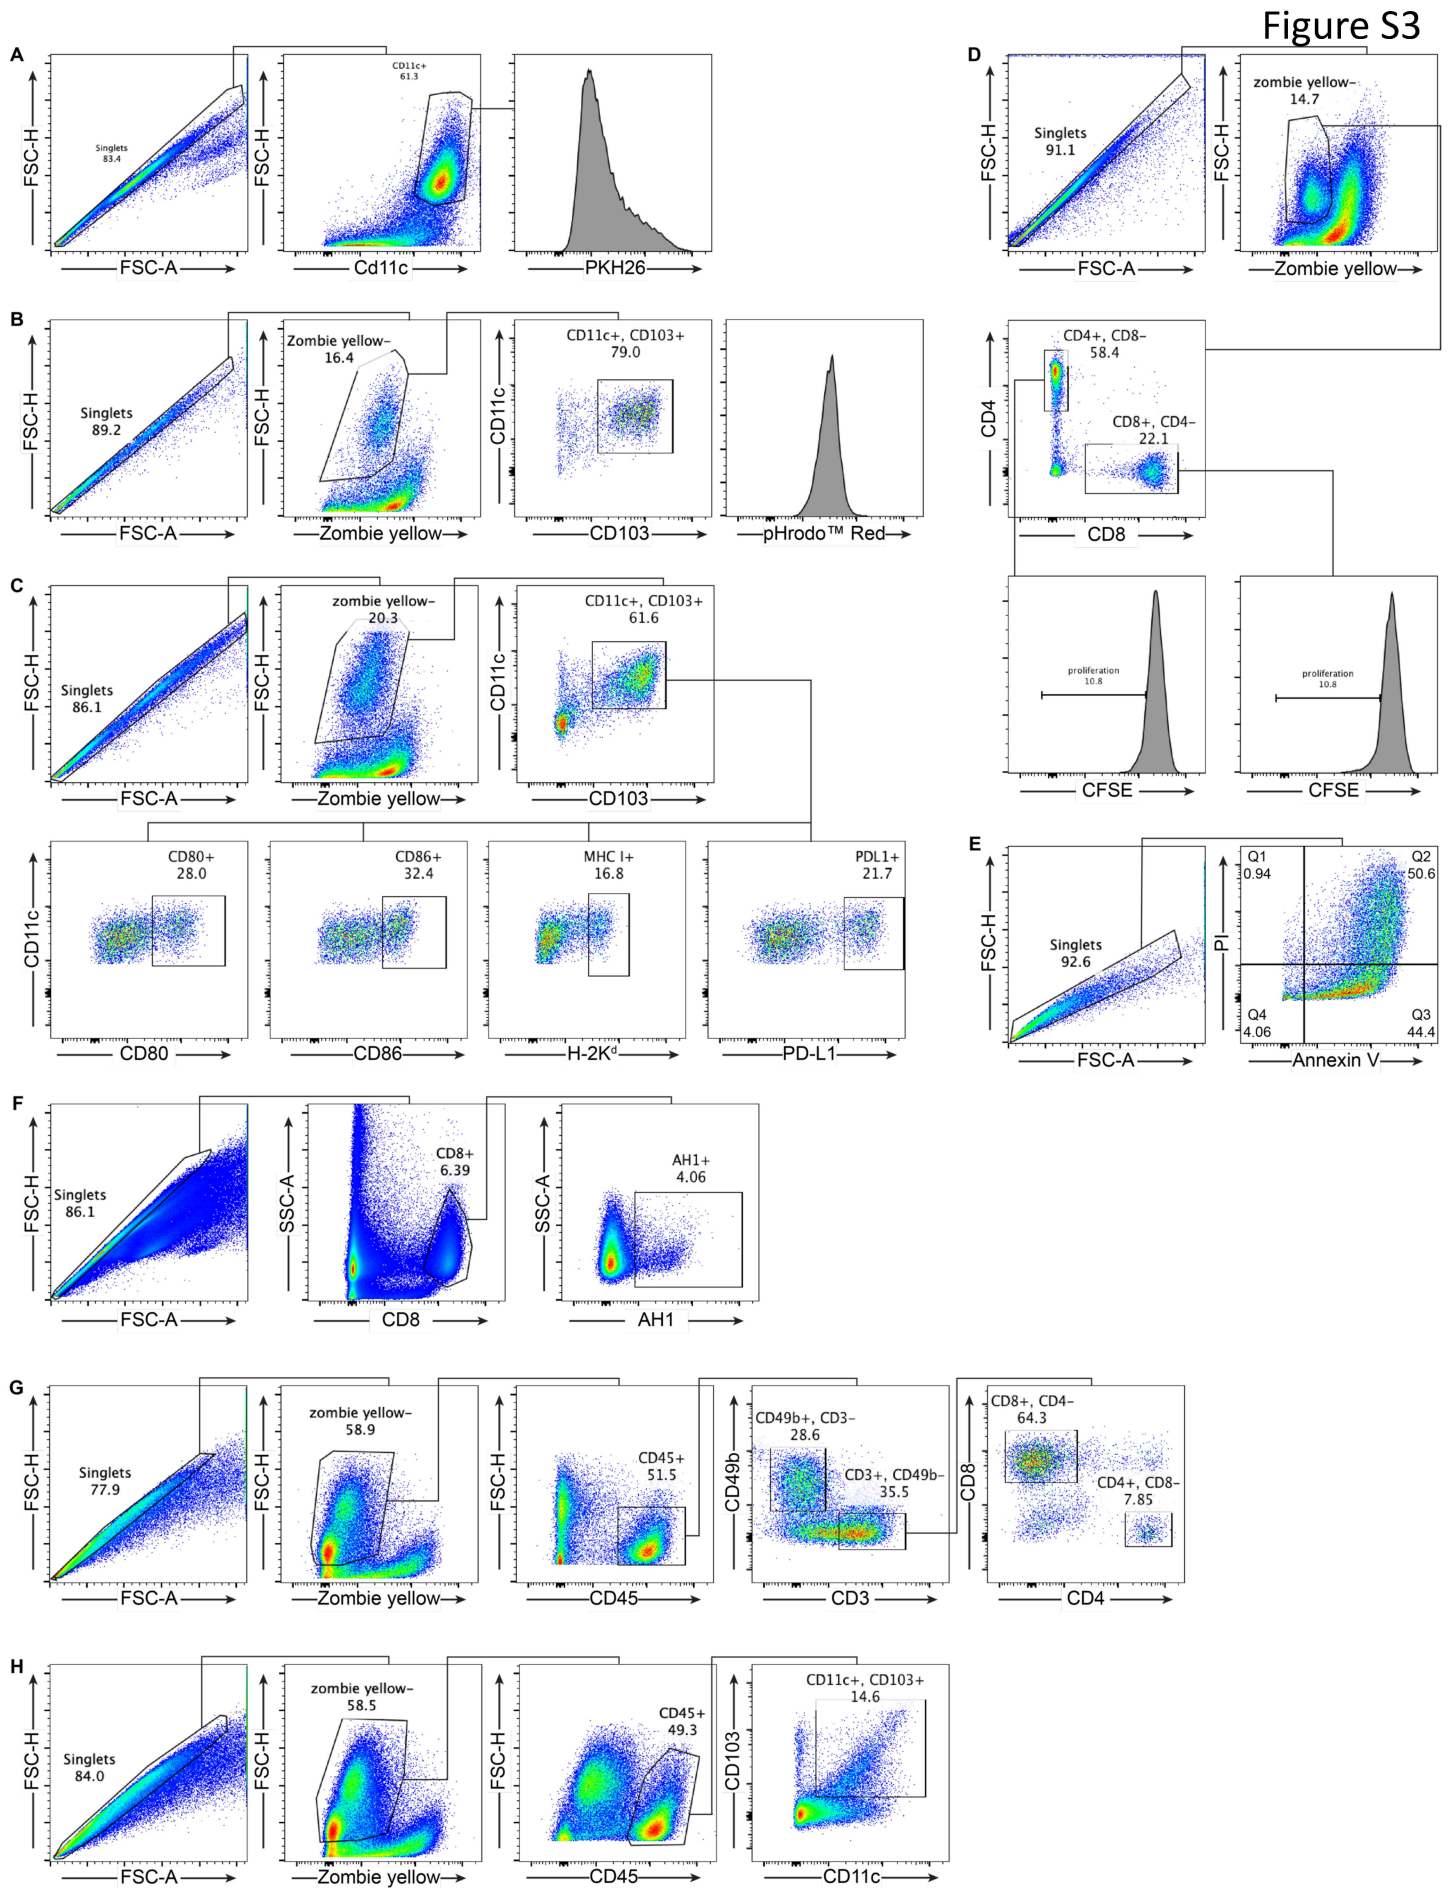

Figure S4

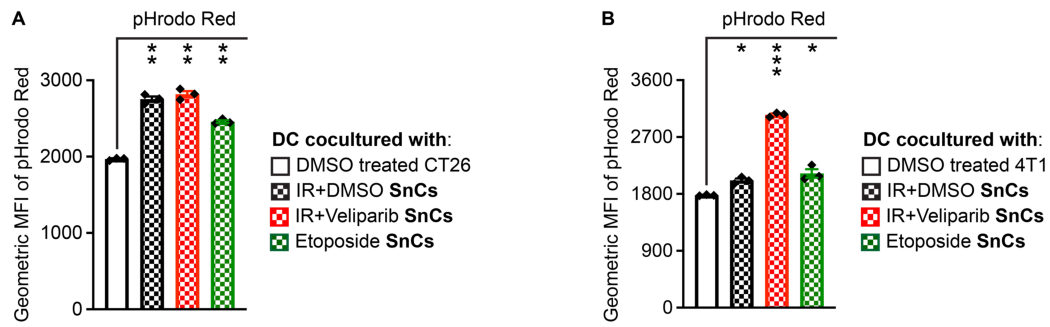

Figure S5

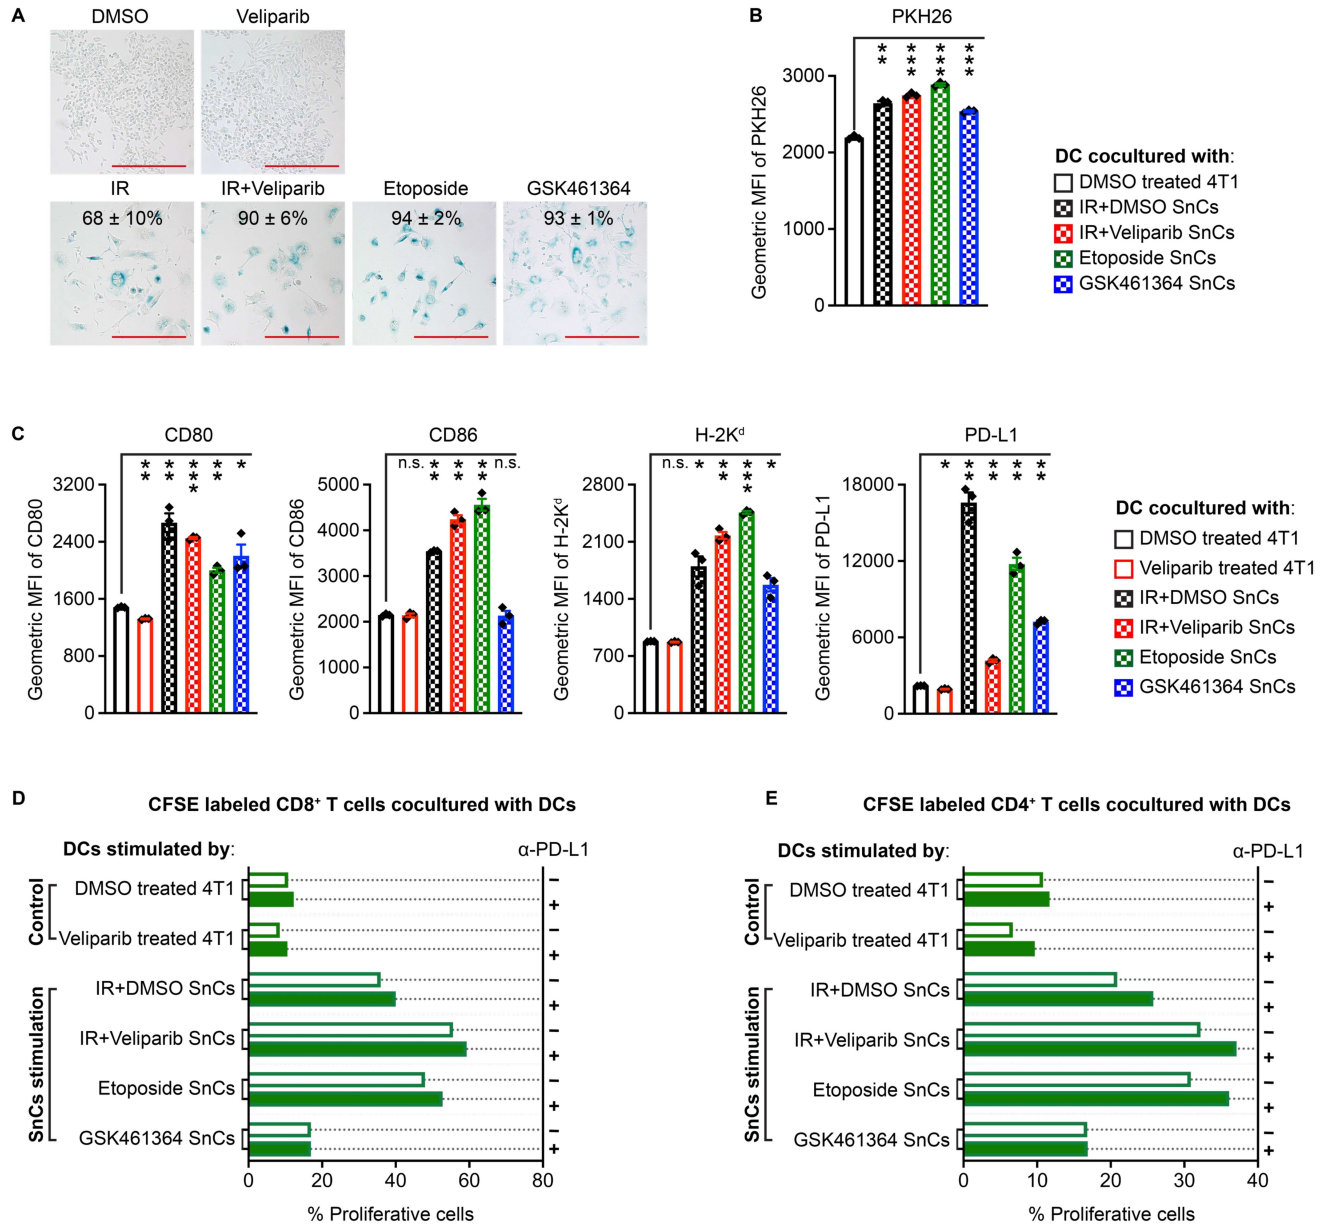

## Figure S6

**A** - anti-PD-L1 antibody, CFSE labeled CD8<sup>+</sup> T cells cocultured with DCs stimulated by:

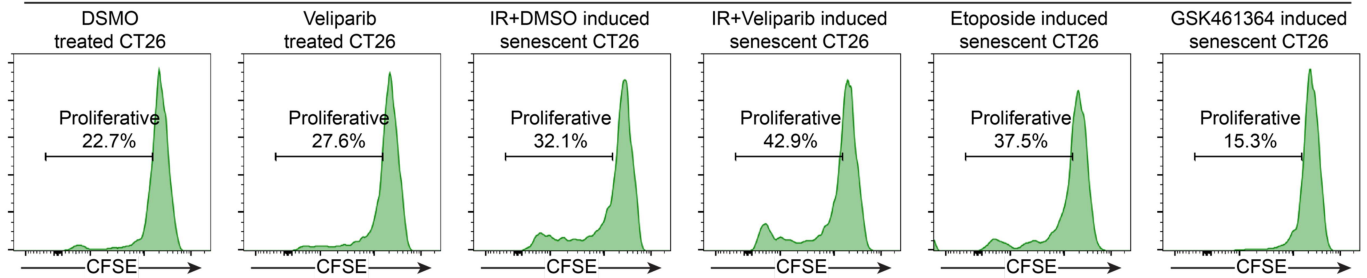

**B** + anti-PD-L1 antibody, CFSE labeled CD8<sup>+</sup> T cells cocultured with DCs stimulated by:

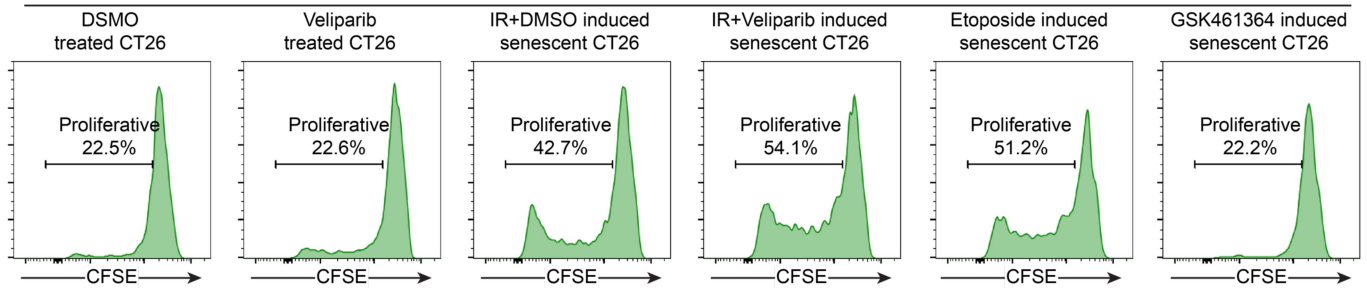

**C** - anti-PD-L1 antibody, CFSE labeled CD4<sup>+</sup> T cells cocultured with DCs stimulated by:

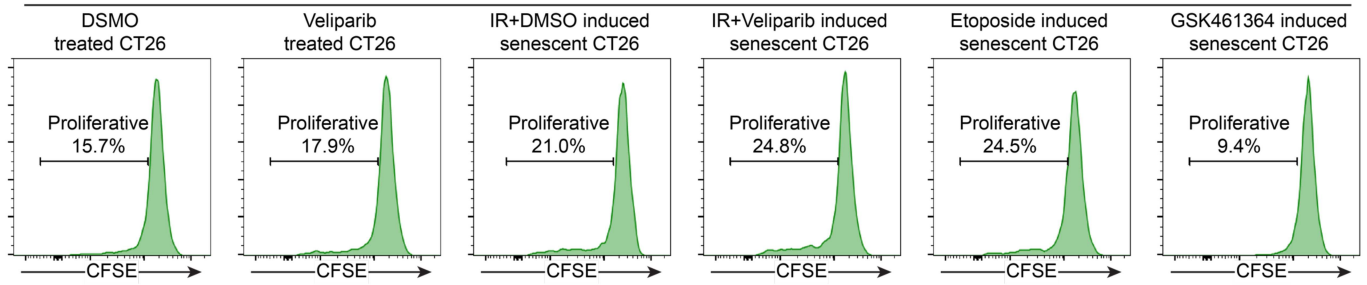

**D** + anti-PD-L1 antibody, CFSE labeled CD4<sup>+</sup> T cells cocultured with DCs stimulated by:

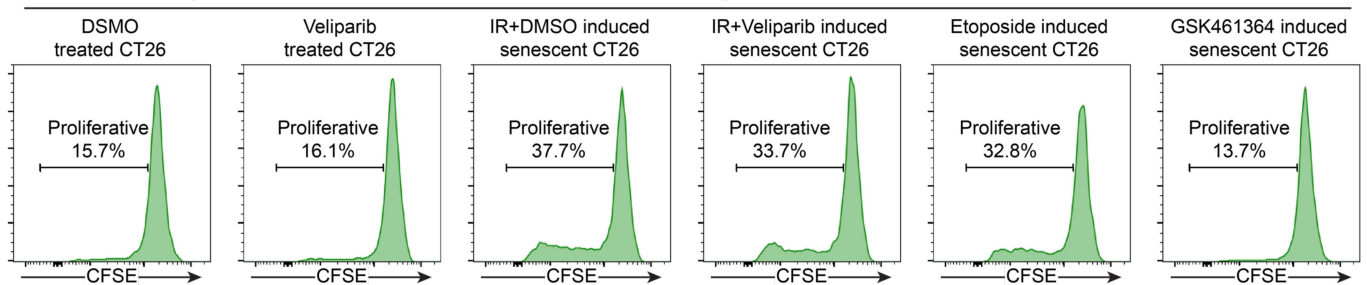

## Figure S7

**A** - anti-PD-L1 antibody, CFSE labeled CD8<sup>+</sup> T cells cocultured with DCs stimulated by:

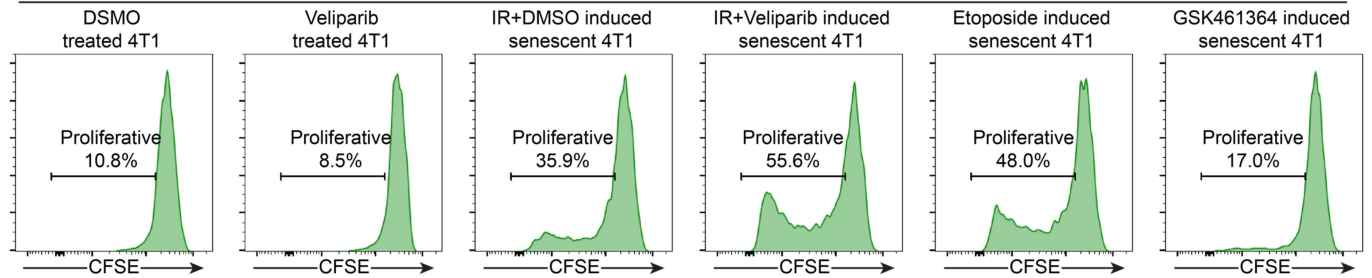

**B** + anti-PD-L1 antibody, CFSE labeled CD8<sup>+</sup> T cells cocultured with DCs stimulated by:

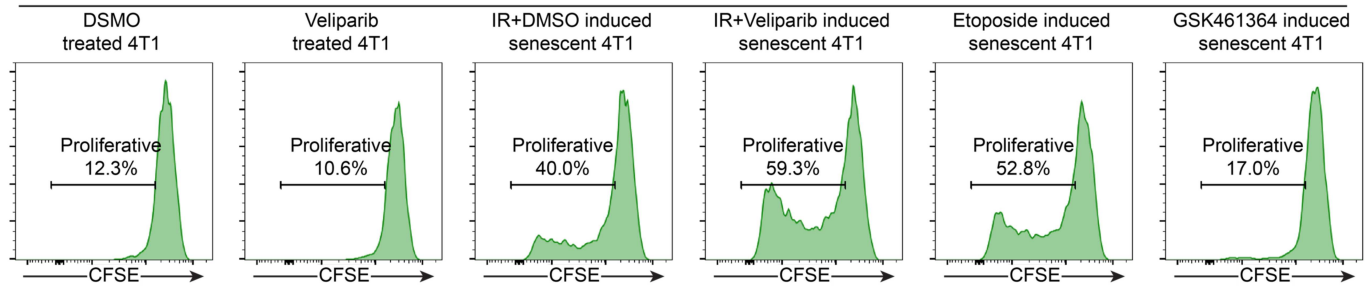

**C** - anti-PD-L1 antibody, CFSE labeled CD4<sup>+</sup> T cells cocultured with DCs stimulated by:

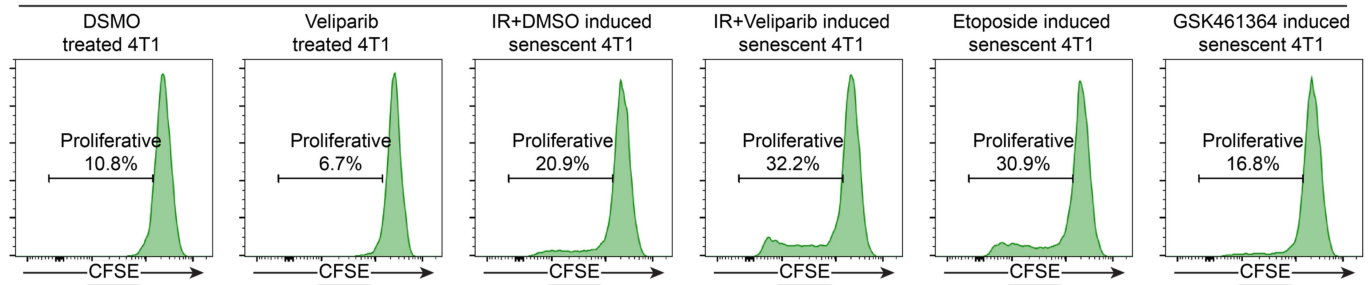

**D** + anti-PD-L1 antibody, CFSE labeled CD4<sup>+</sup> T cells cocultured with DCs stimulated by:

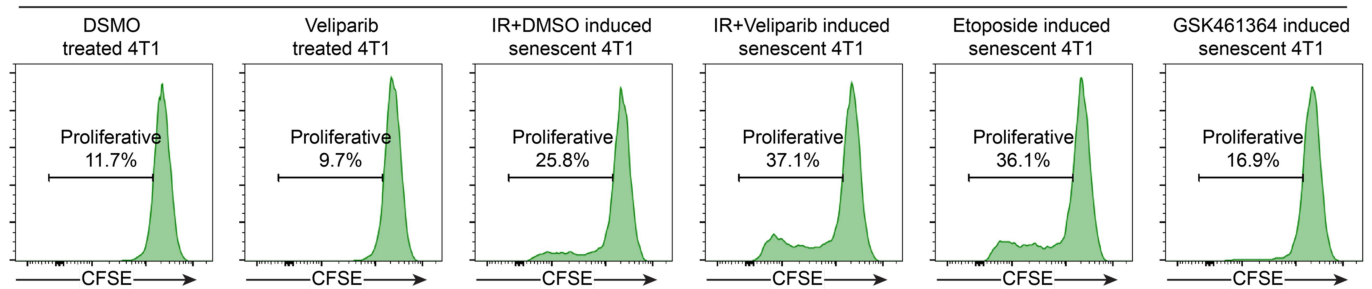

Figure S8

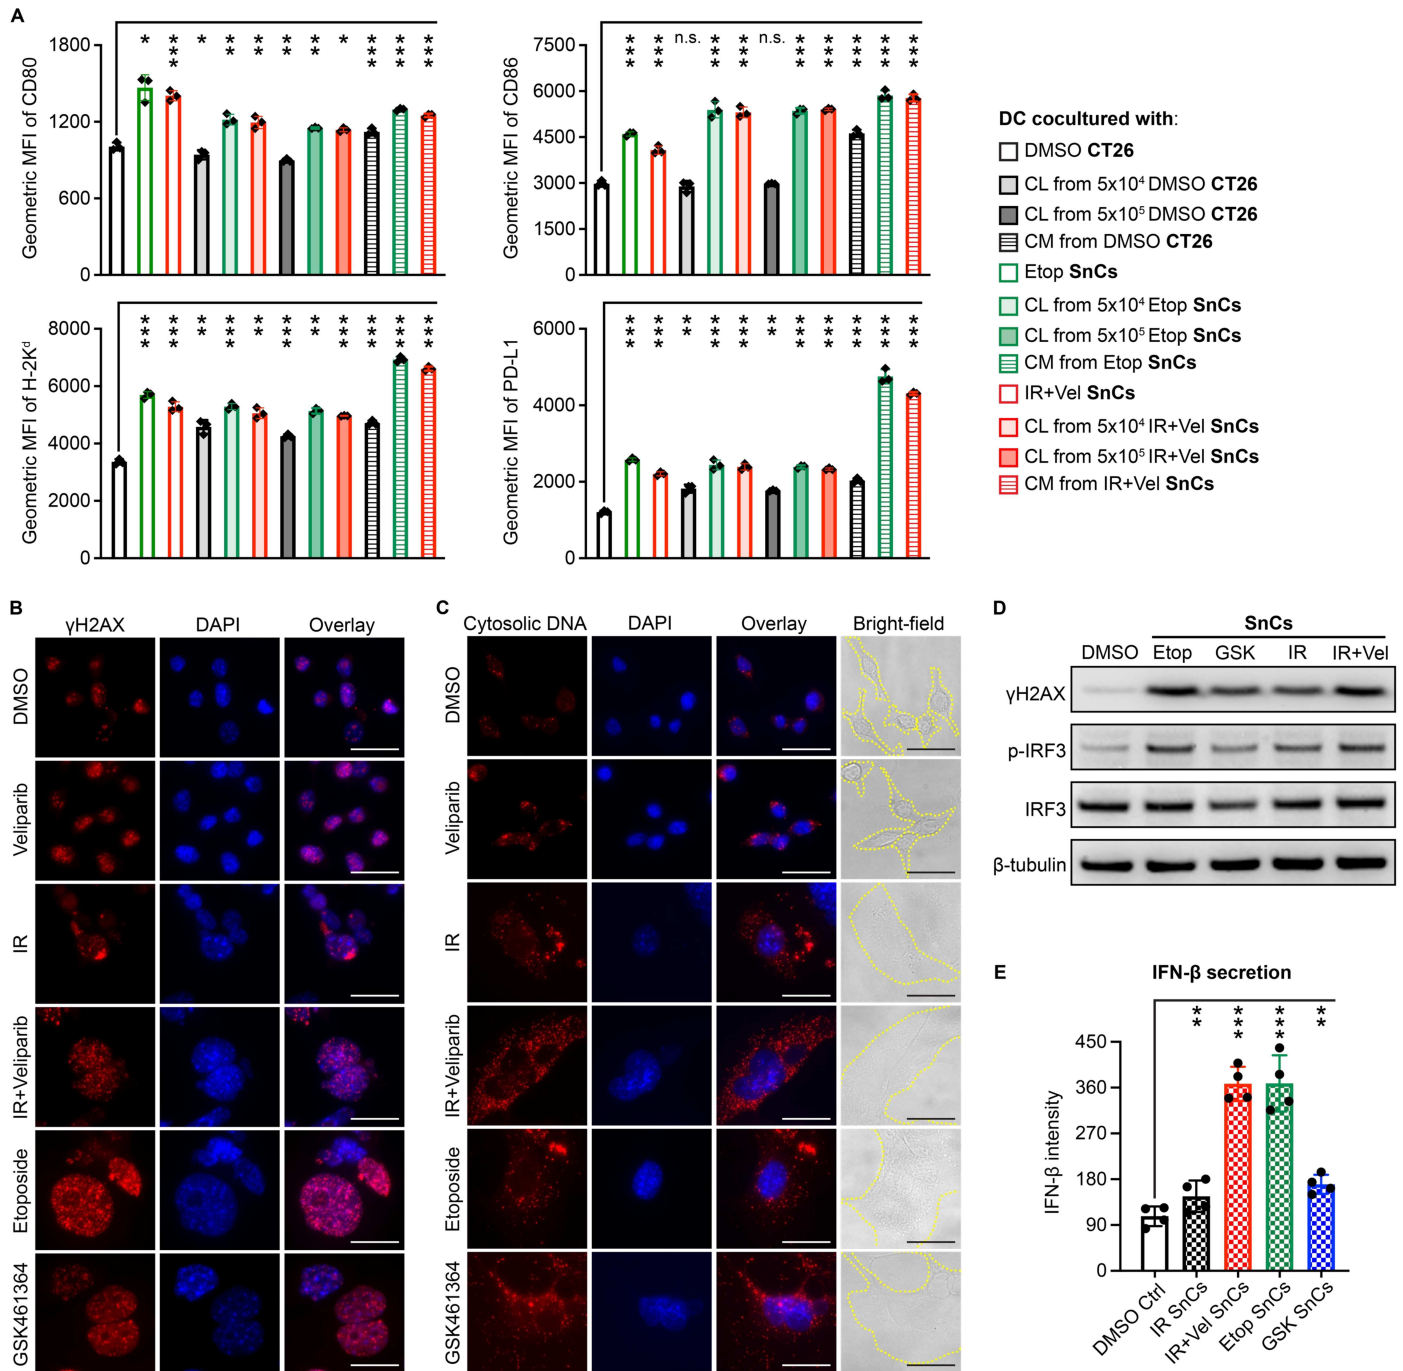



Figure S9

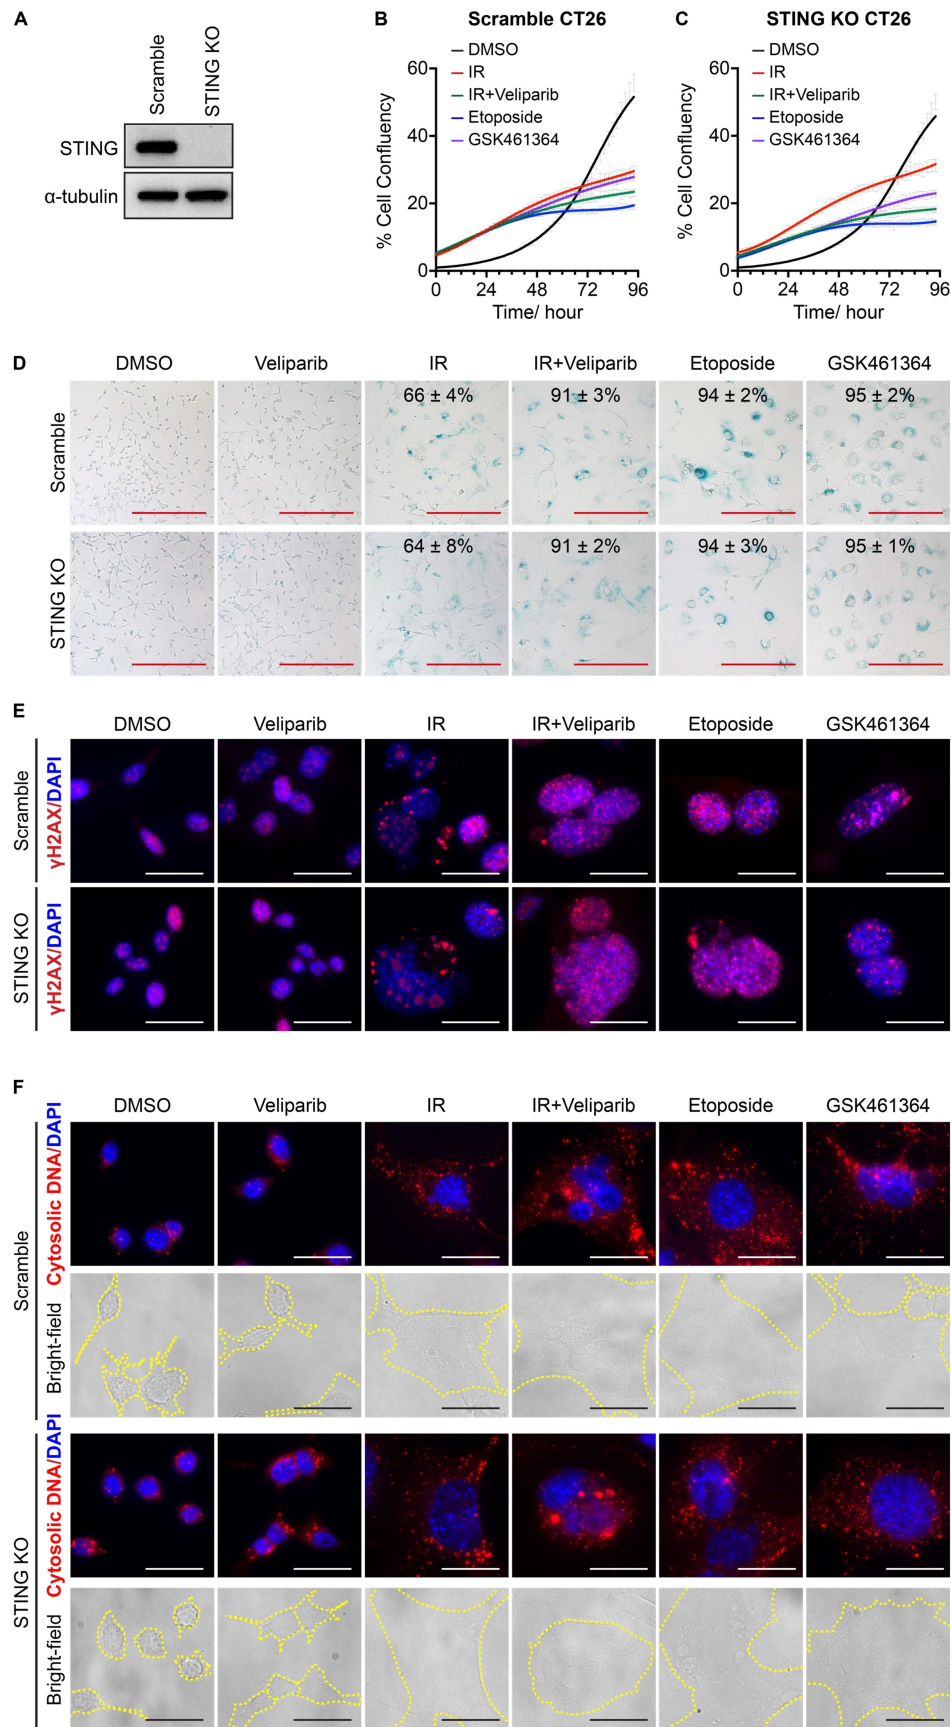

Figure S10

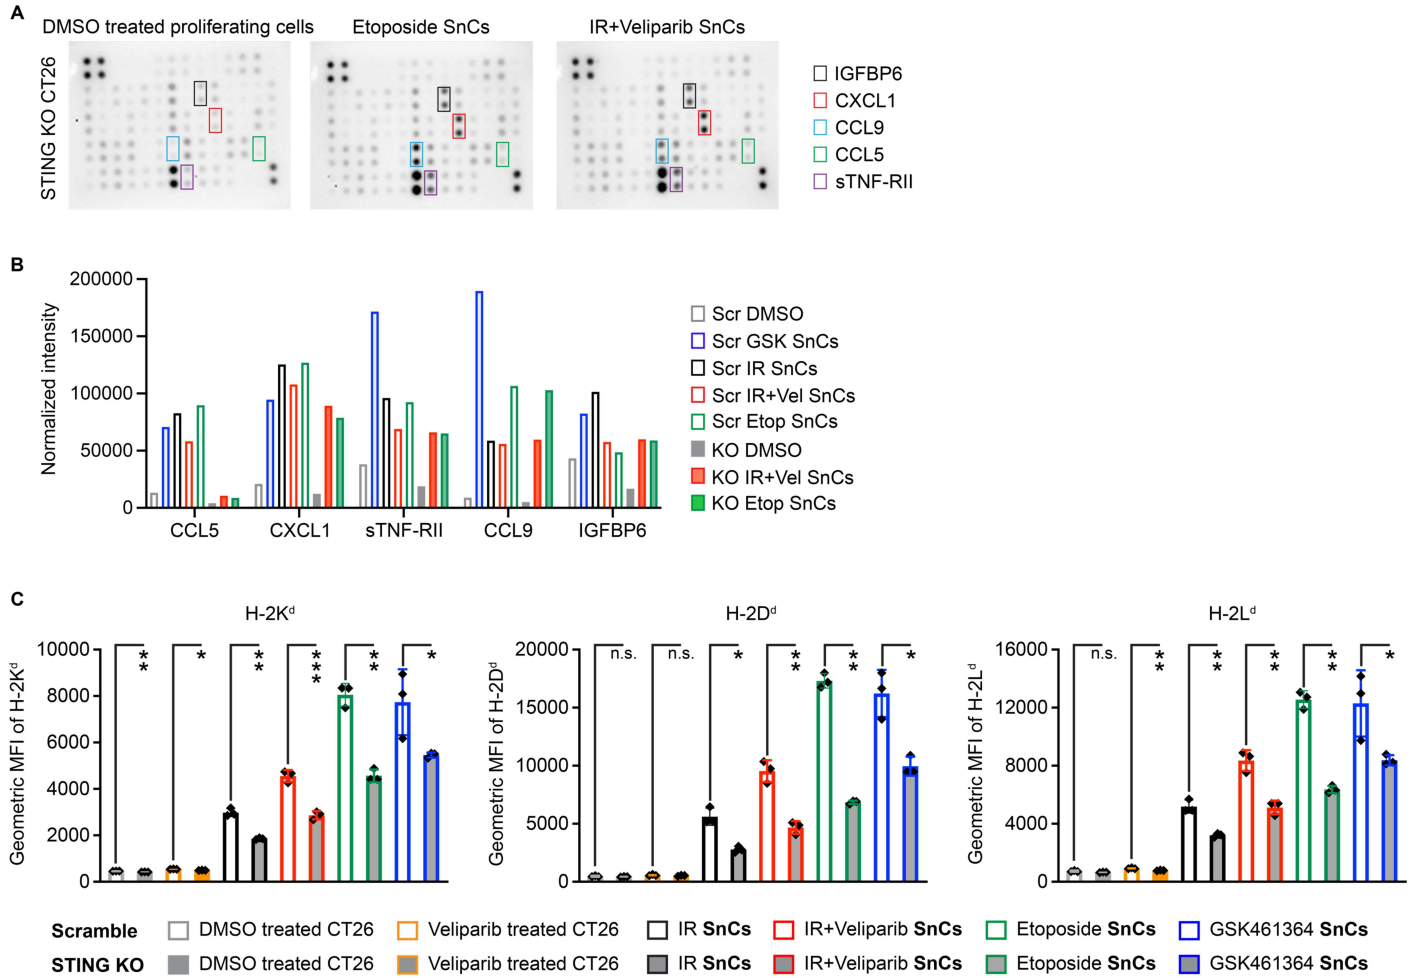

Figure S11

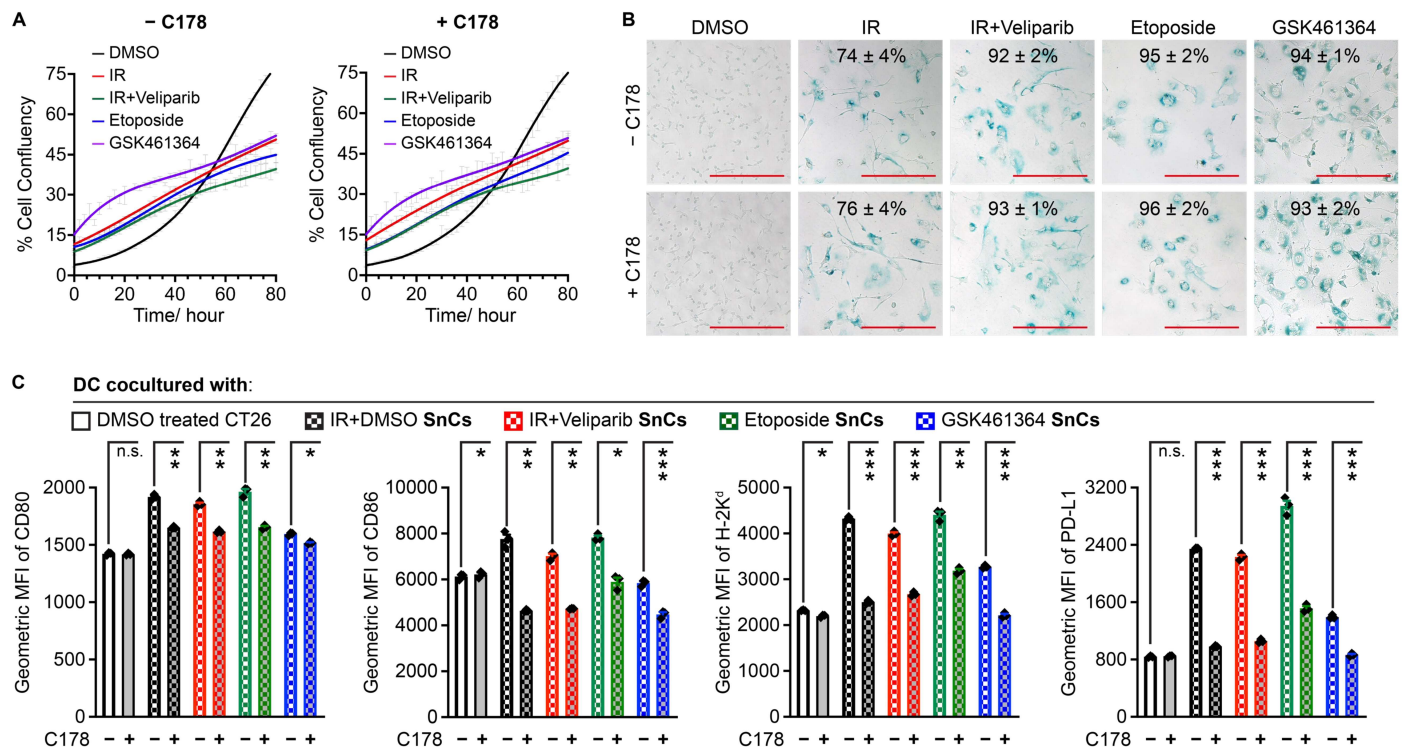

Figure S12

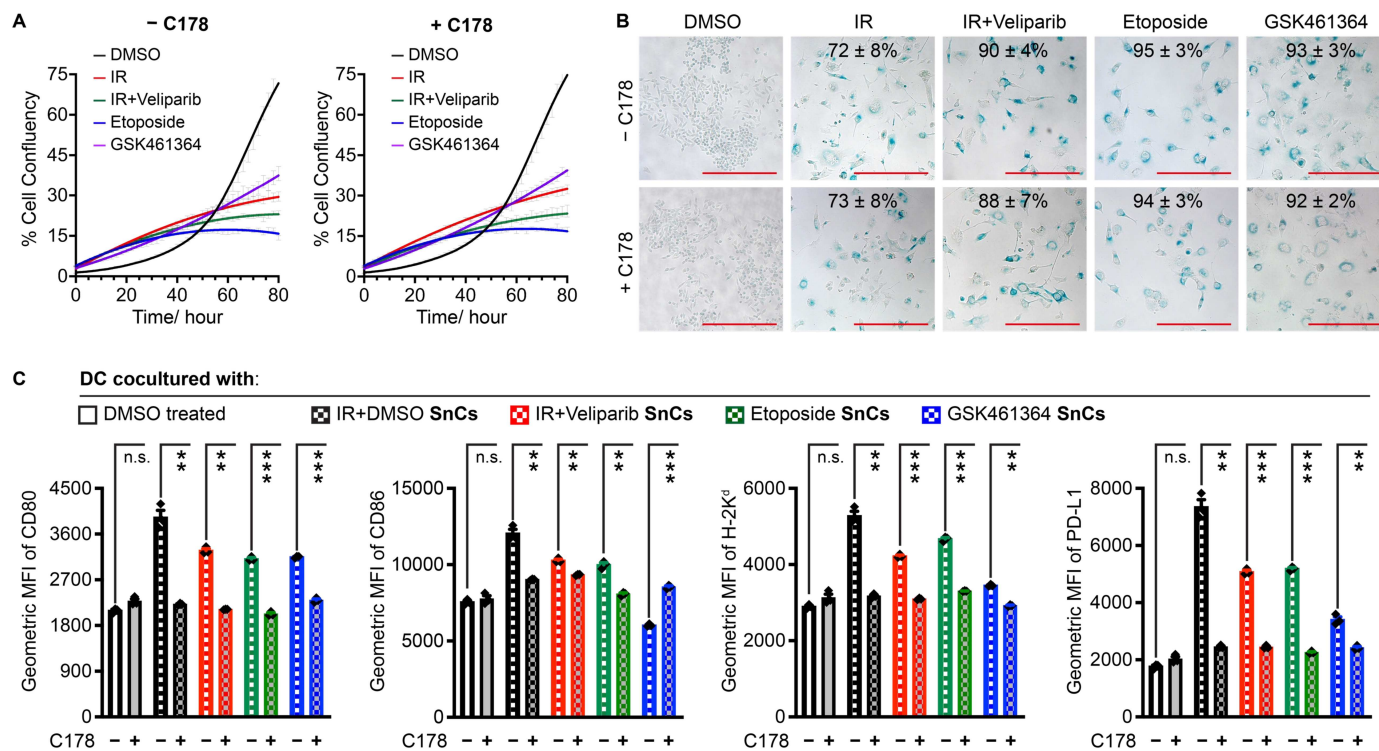

Figure S13

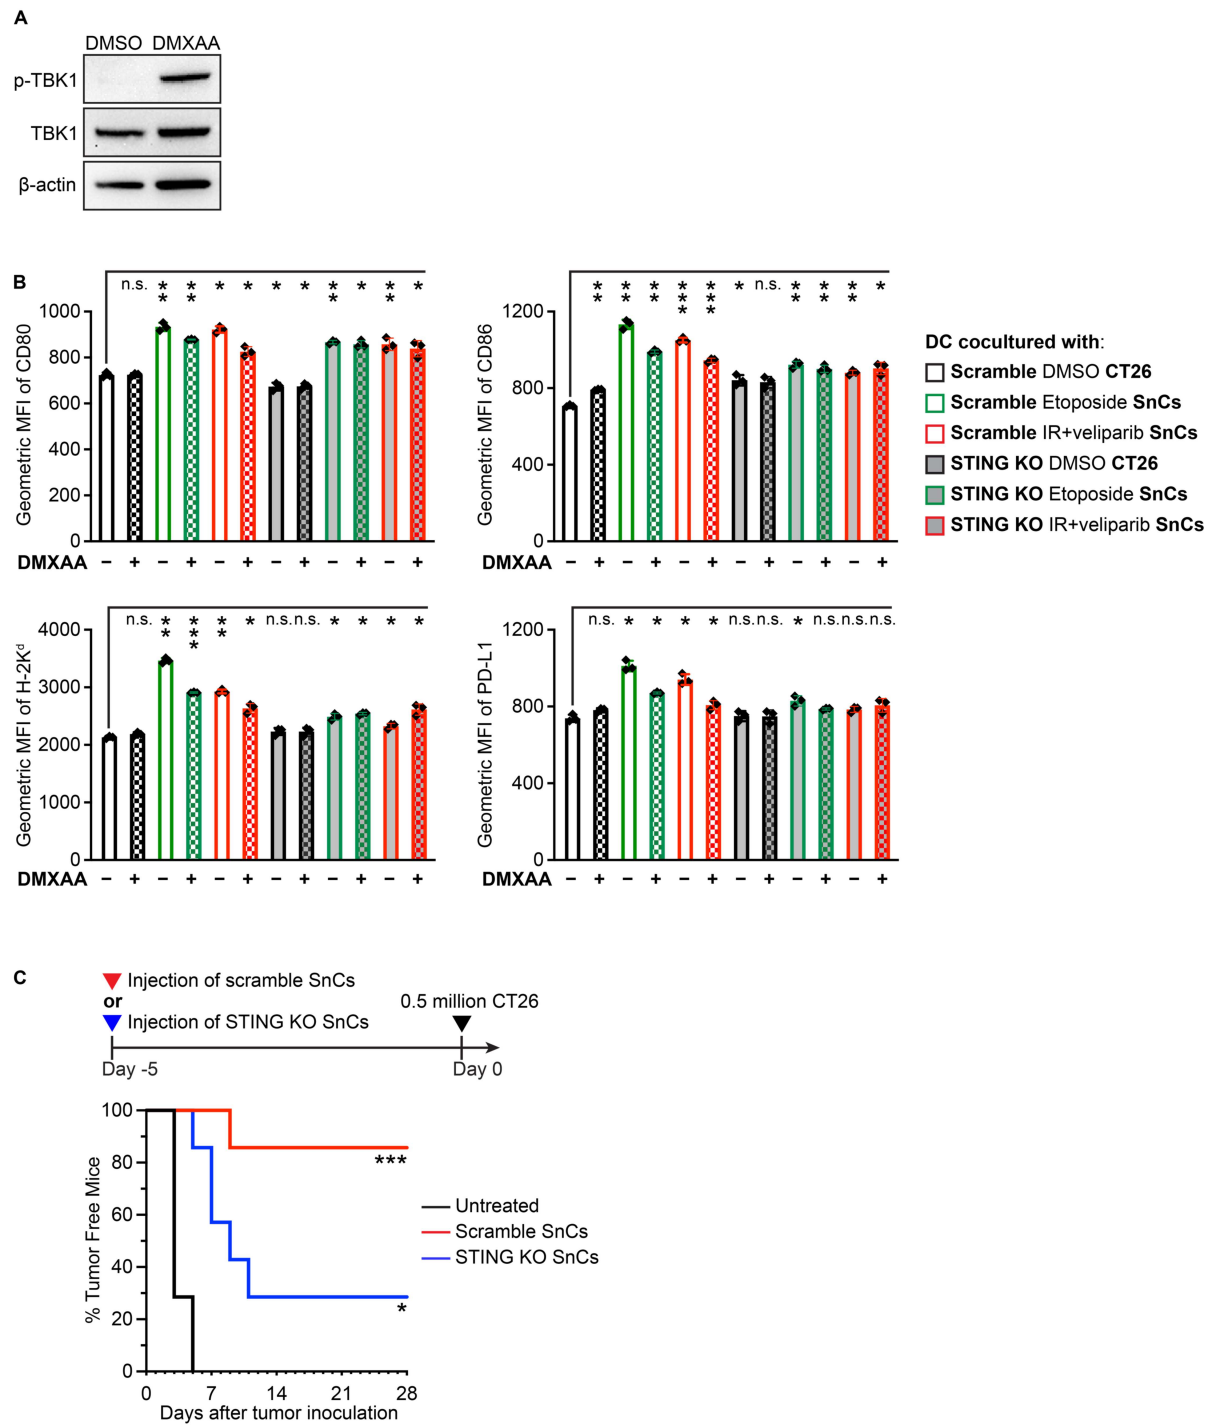

Figure S14

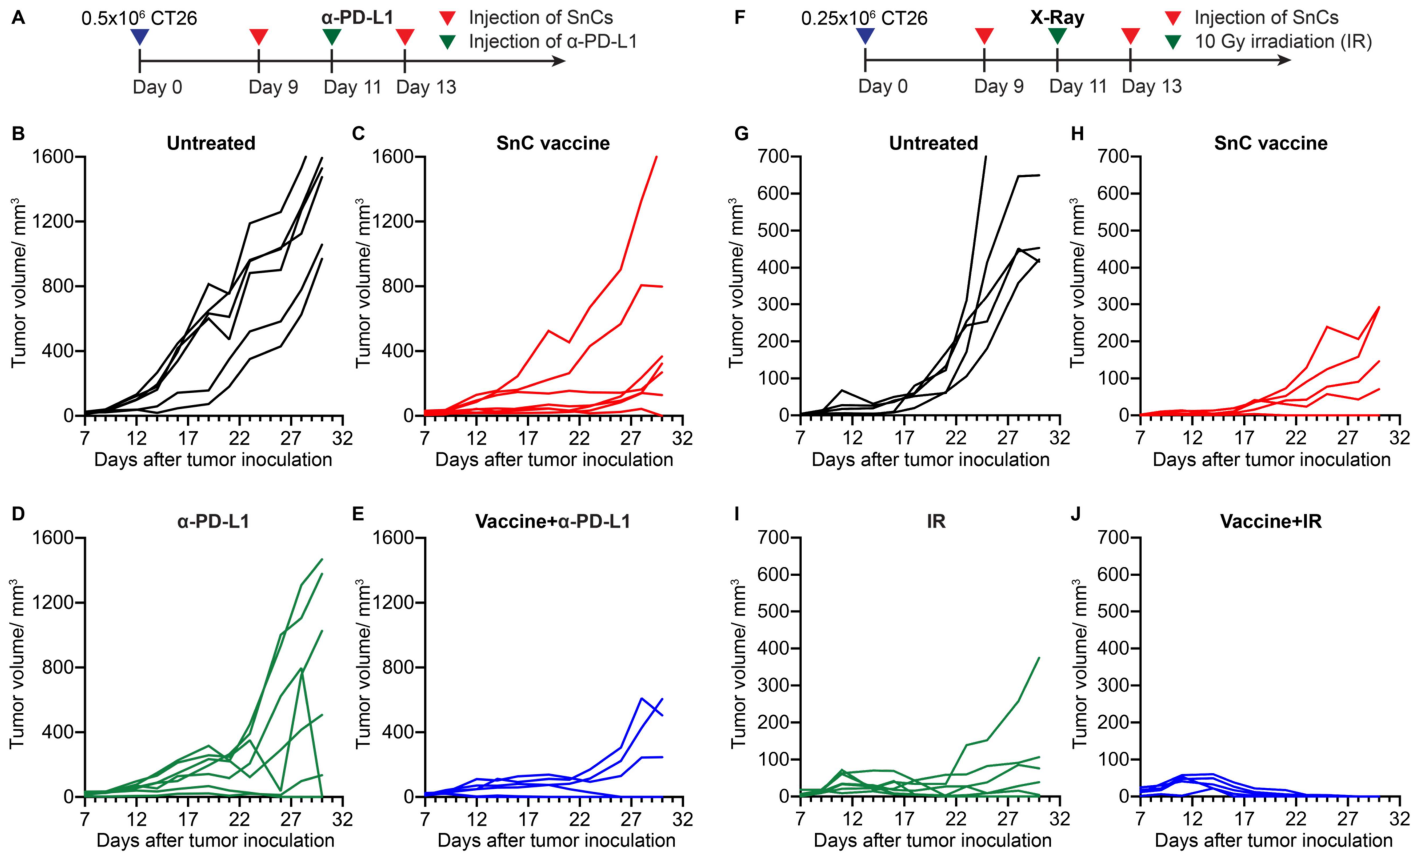

Figure S15

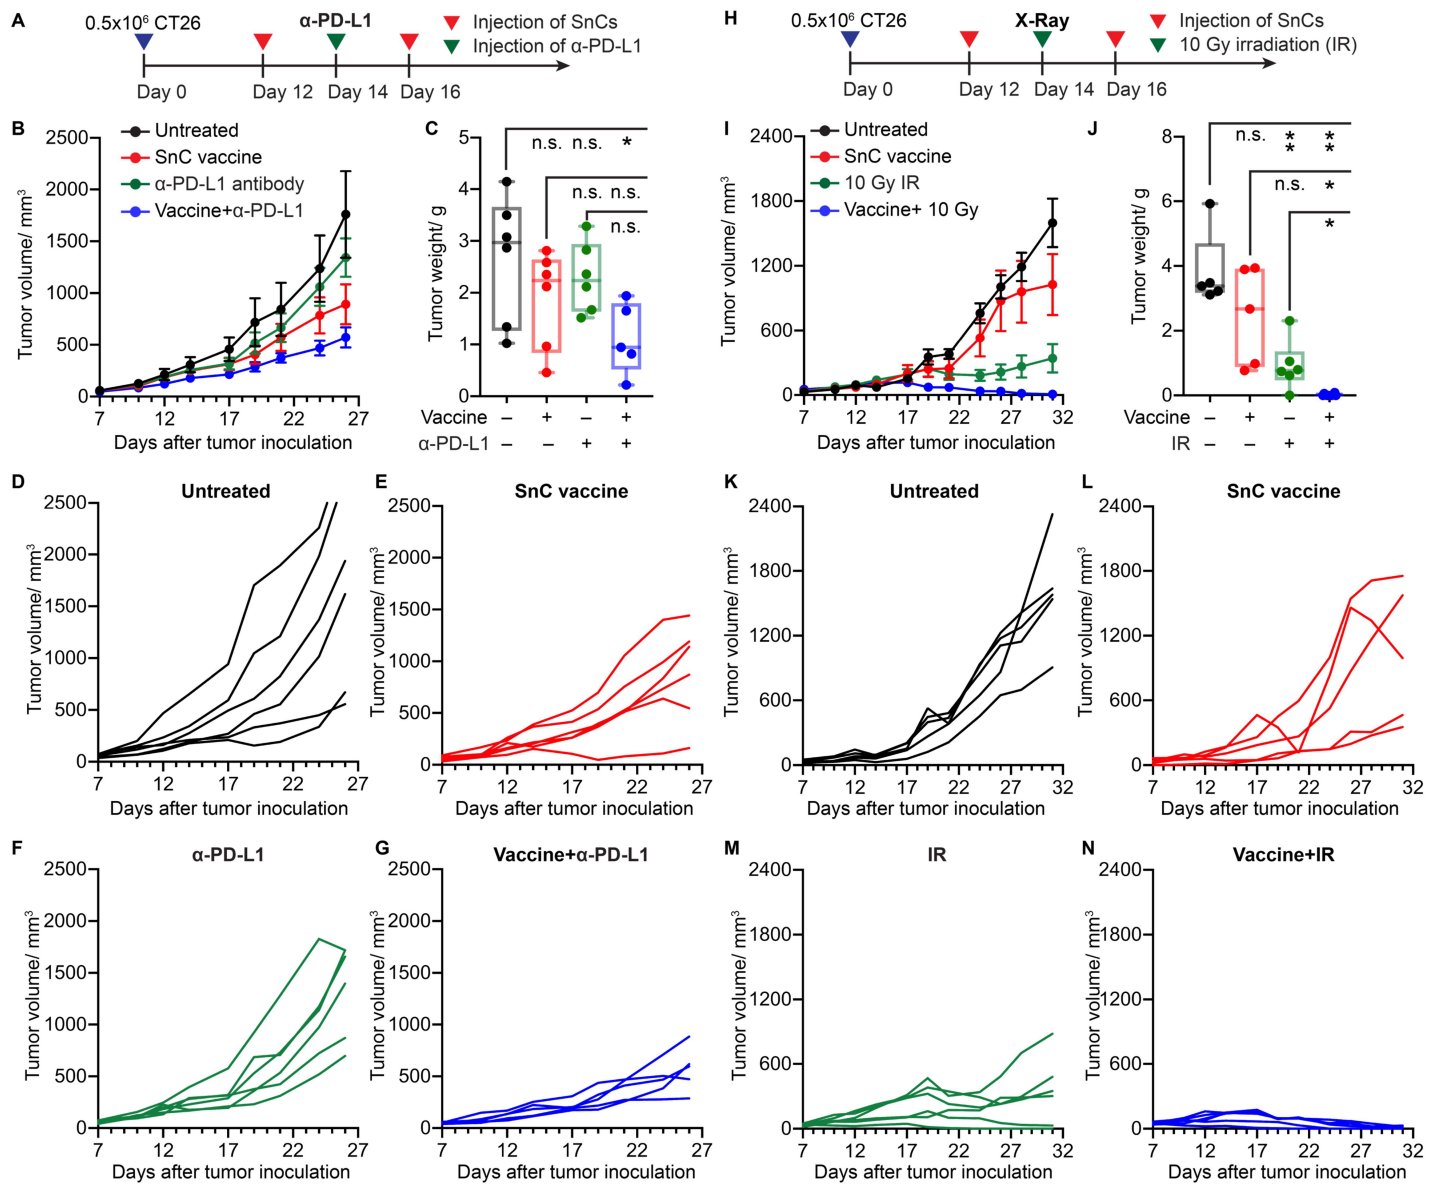

Figure S16

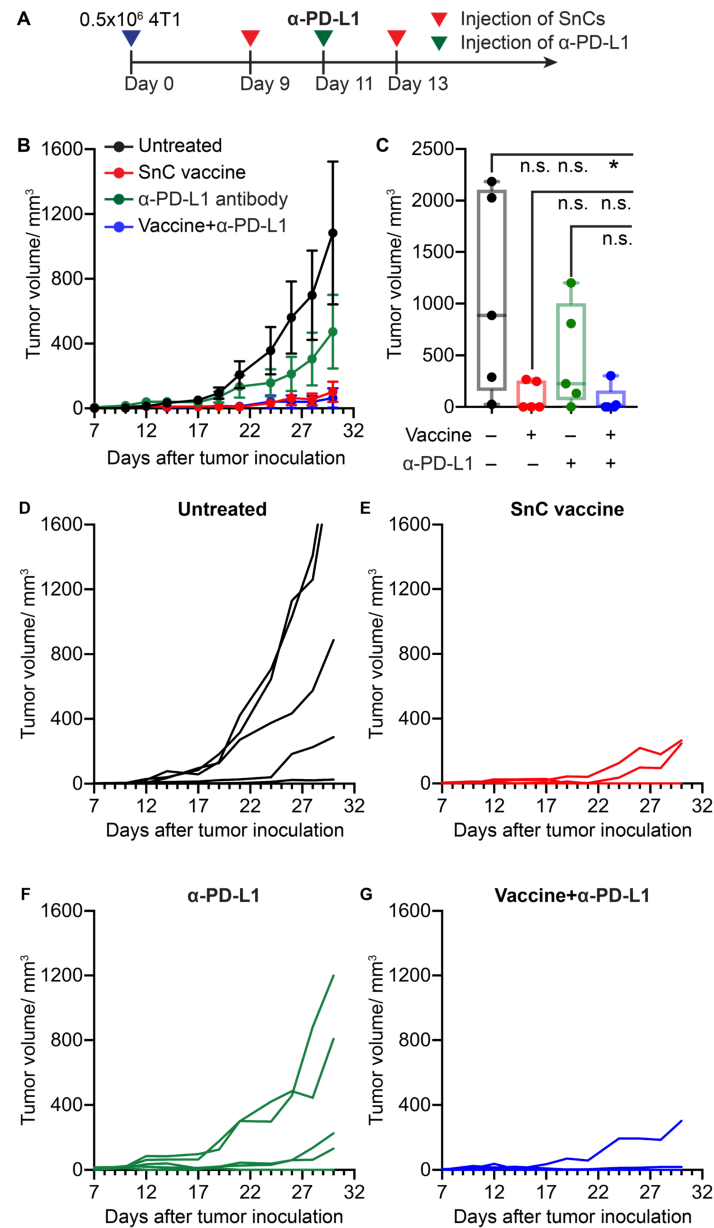



Figure S17

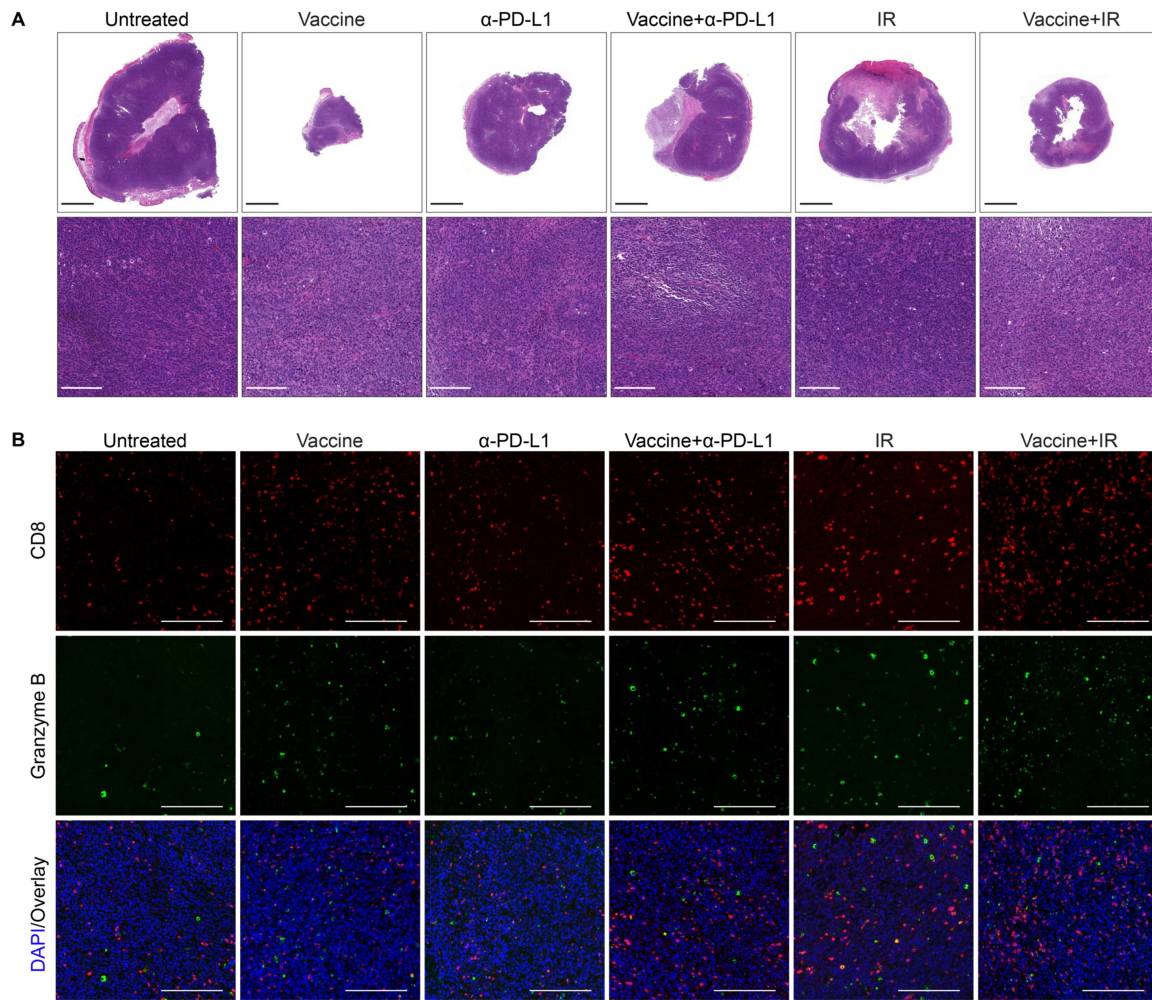

Figure S18

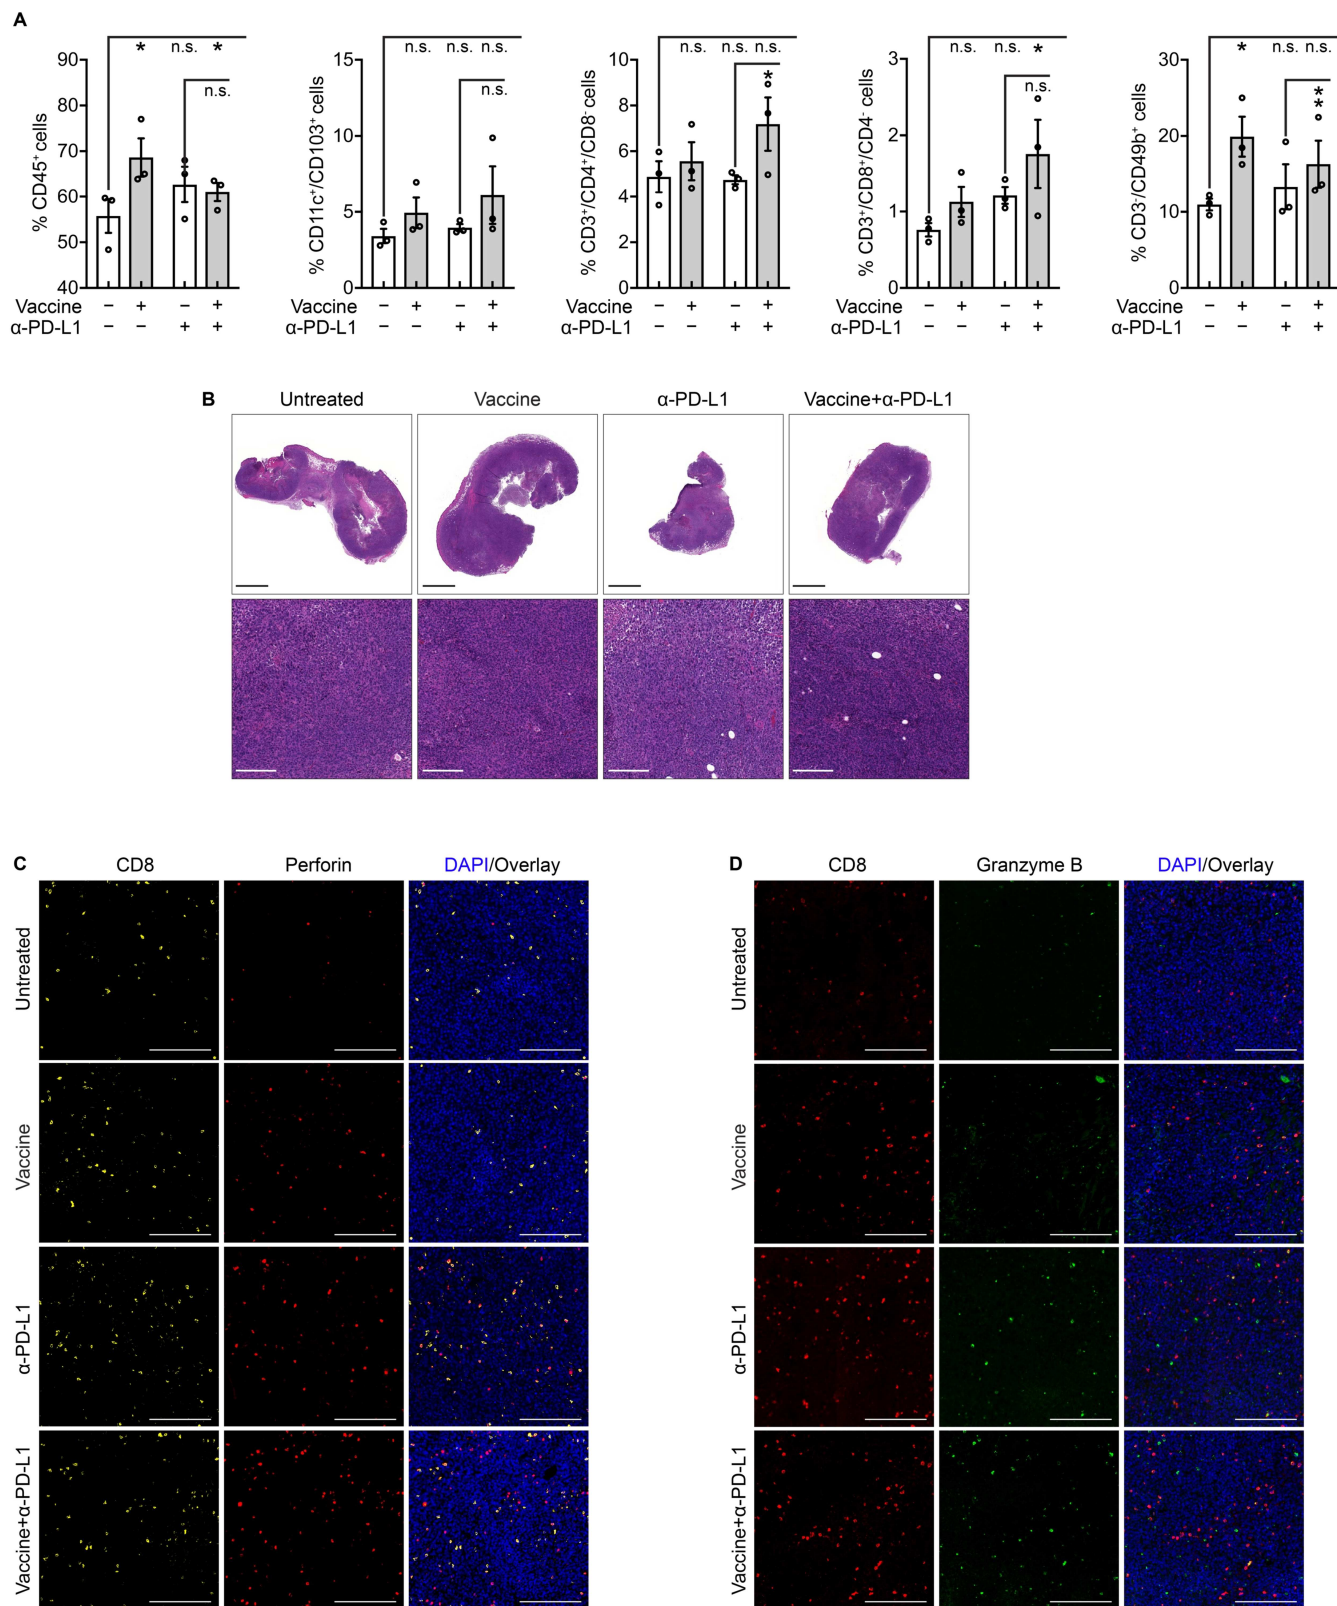

Figure S19

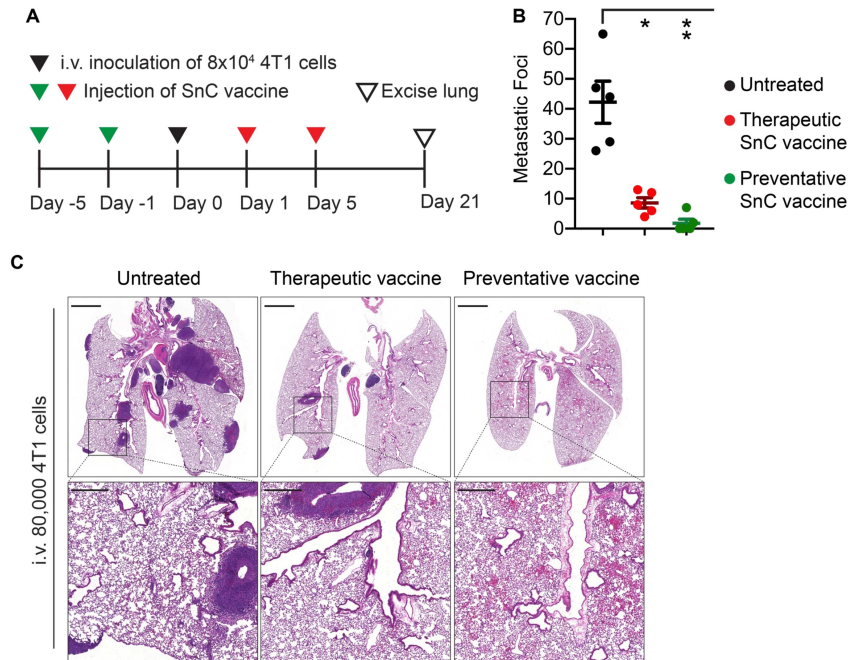

Figure S20

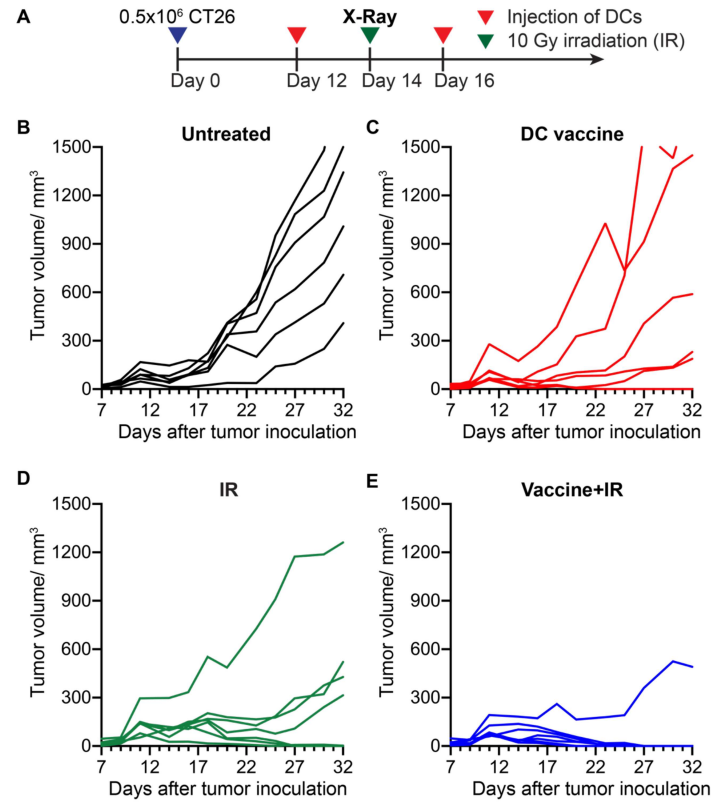

Supplement: jitc-2022-005862supp001_data_supplement.pdf [file jitc-2022-005862supp001_data_supplement.pdf]
